# Supplementary material for: H2O and Cl in deep crustal melts: the message of melt inclusions in metamorphic rocks
Source: Copernicus journal article supplement (doi:10.5194/ejm-35-1031-2023), 2023-11-23
Supplement: Supplementary file 1 [file ejm-35-1031-2023-supplement.zip]

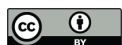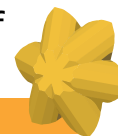

*Supplement of*

**H<sub>2</sub>O and Cl in deep crustal melts: the message of melt inclusions  
in metamorphic rocks**

**Silvio Ferrero et al.**

*Correspondence to:* Silvio Ferrero ([silvio.ferrero@unica.it](mailto:silvio.ferrero@unica.it))

- [ejm-35-1031-2023-supplement-title-page.pdf](#)
- [Fig. S1\\_calib curves.jpg](#)
- [Table S1-S3-S2.xlsx](#)

The copyright of individual parts of the supplement might differ from the article licence.
